# Supplementary material for: Human-Like Robots and the Uncanny Valley
Source: Atypon-hosted journal article supplement (doi:10.1027/2151-2604/a000486), 2022-01-01
Supplement: 2151-2604_a000486_esm1.pdf [file 2151-2604_a000486_esm1.pdf]

**Electronic Supplementary Material for**

**Mara, M., Appel, M., & Gnambs, T. (2022). Human-Like Robots and the Uncanny Valley: A Meta-Analysis of User Responses Based on the Godspeed Scales. *Zeitschrift für Psychologie*, 230(1). <https://doi.org/10.1027/2151-2604/a000486>**

Supplement Material for

**Human-Like Robots and the Uncanny Valley:****A Meta-Analysis of User Responses Based on the Godspeed Scales**

|                                                 |    |
|-------------------------------------------------|----|
| Coded Variables                                 | 2  |
| PRISMA Flow Diagram                             | 4  |
| Coded Data                                      | 5  |
| Reliability Generalizations                     | 10 |
| Meta-Analyses of Godspeed Scale Scores by Robot | 11 |
| Analysis of Publication Bias                    | 13 |
| Identification of Nonlinearity                  | 15 |
| Sensitivity Analyses                            | 16 |
| PRISMA 2020 Checklist                           | 18 |
| Additional References                           | 21 |

## Coded Variables

| Variable | Description                                            | Value                                                                                                          | Example        |
|----------|--------------------------------------------------------|----------------------------------------------------------------------------------------------------------------|----------------|
| study    | Study ID: last name of first author + publication year | open text                                                                                                      | schmidt2012    |
| pubyear  | Publication year                                       | value range: [2009, 2020]                                                                                      | 2012           |
| sno      | Unique ID for each sample                              | value range: [1,[                                                                                              | 1              |
| mno      | Unique number of measure within sample                 | value range: [1,[                                                                                              | 1              |
| centry   | Country of origin of participants as ISO code          | open text                                                                                                      | DE             |
| lang     | Language of instrument                                 | 1 = English<br>2 = German<br>3 = Japanese<br>4 = other                                                         | 1              |
| lang2    | Other language                                         | open text                                                                                                      | Klingon        |
| pubtype  | Publication type                                       | 1 = journal,<br>2 = presentation /<br>proceedings,<br>3 = thesis (master/phd)<br>4 = book chapter<br>5 = other | 2              |
| robot    | Description of the robot                               | open text                                                                                                      | R2D2           |
| n        | Sample size                                            | value range: [1,[                                                                                              | 30             |
| sample   | Description of sample                                  | open text                                                                                                      | Undergraduates |
| samptype | Type of sample                                         | 0 = primarily students /<br>university personnel<br>1 = general public<br>2 = children<br>3 = other            | 0              |
| female   | Percentage of women in sample (%)                      | value range: [0,100]                                                                                           | 50             |
| age      | Mean age (in years) of participants                    | value range: [18,[                                                                                             | 20             |
| items    | Number of items in anthropomorphism scale              | value range: [1,[                                                                                              | 5              |
| m1       | Mean of anthropomorphism scale                         | value range: [0,[                                                                                              | 3              |
| sd1      | Standard deviation of anthropomorphism scale           | value range: [0,[                                                                                              | 1              |
| se1      | Standard error of anthropomorphism scale               | value range: [0,[                                                                                              | 1              |
| alpha1   | Cronbach's alpha for anthropomorphism scale            | value range: [0,1]                                                                                             | 0,8            |
| items2   | Number of items in likeability scale                   | value range: [0,[                                                                                              | 5              |
| m2       | Mean of likeability scale                              | value range: [0,[                                                                                              | 3              |
| sd2      | Standard deviation of likeability scale                | value range: [0,[                                                                                              | 1              |
| se2      | Standard error of likeability scale                    | value range: [0,[                                                                                              | 1              |

| <b>Variable</b> | <b>Description</b>                                      | <b>Value</b>                                                     | <b>Example</b>      |
|-----------------|---------------------------------------------------------|------------------------------------------------------------------|---------------------|
| alpha2          | Cronbach's alpha for likeability scale                  | value range: [0,1]                                               | 0,8                 |
| plot            | Were statistics reported or derived from plots?         | 0 = reported<br>1 = from plots                                   | 0                   |
| page            | Page of publication that the statistics are reported on | open text                                                        | p11                 |
| scale           | Number of response scales of the administered items     | value range: [2,[                                                | 5                   |
| mode            | How was the robot presented?                            | 0 = Physical presentation<br>1 = Photo<br>2 = Video<br>3 = other | 0                   |
| mode2           | How was the robot presented? other                      | open text                                                        | virtual environment |
| move            | Did the robot move?                                     | 0 = not moving<br>1 = moving                                     | 0                   |
| talk            | Did the robot talk?                                     | 0 = not talking<br>1 = talking                                   | 0                   |
| note            | General comments                                        | open text                                                        |                     |

**PRISMA Flow Diagram**

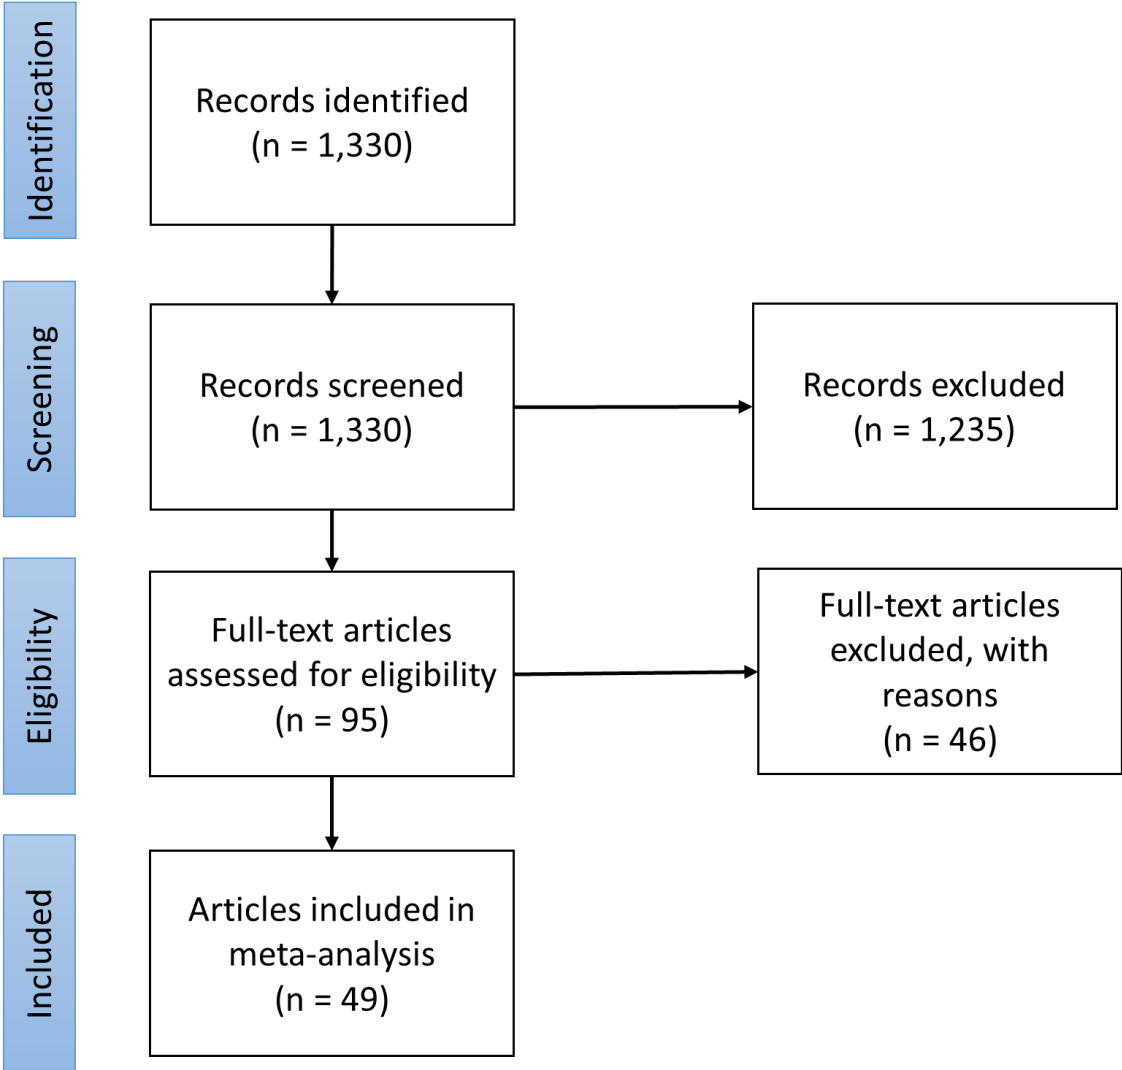

## Coded Data

| Study                   | Year | Country | Robot   | <i>N</i> | <i>M<sub>A</sub></i> | <i>SE<sub>A</sub></i> | <i>M<sub>L</sub></i> | <i>SE<sub>L</sub></i> | Real | Moving | Talking | Plot | Bias |
|-------------------------|------|---------|---------|----------|----------------------|-----------------------|----------------------|-----------------------|------|--------|---------|------|------|
| Avelino et al. (2018)   | 2018 | PT      | Vizzy   | 21       | 3,29                 | 0,09                  | 4,39                 | 0,1                   | yes  | yes    | no      | yes  | 5    |
|                         | 2018 | PT      | Vizzy   | 22       | 2,94                 | 0,07                  | 4,06                 | 0,13                  | yes  | yes    | no      | yes  | 5    |
| Barlas (2019)           | 2019 | DE      | NAO     | 30       | 2,62                 | 0,11                  | 4,04                 | 0,01                  | yes  | yes    | yes     | yes  | 5    |
|                         | 2019 | DE      | NAO     | 30       | 2,49                 | 0,08                  | 3,89                 | 0,02                  | yes  | yes    | yes     | yes  | 5    |
|                         | 2019 | DE      | NAO     | 24       | 2,61                 | 0,16                  | 4,04                 | 0,02                  | yes  | yes    | yes     | yes  | 5    |
|                         | 2019 | DE      | NAO     | 24       | 2,43                 | 0,14                  | 4,2                  | 0,02                  | yes  | yes    | yes     | yes  | 5    |
| Busch et al. (2019)     | 2019 | UK      | ARMAR-6 | 6        | 2,5                  | 0,37                  | 3,3                  | 0,12                  | no   | yes    | no      | no   | 2    |
|                         | 2019 | UK      | ARMAR-6 | 7        | 2,09                 | 0,43                  | 3,23                 | 0,18                  | no   | yes    | no      | no   | 2    |
| Churamani et al. (2017) | 2017 | DE      | NICO    | 13       | 2,56                 | 0,15                  | 3,71                 | 0,13                  | yes  | yes    | yes     | yes  | 4    |
|                         | 2017 | DE      | NICO    | 14       | 2,58                 | 0,09                  | 4,11                 | 0,09                  | yes  | yes    | yes     | yes  | 4    |
| Cuijpers et al. (2011)  | 2011 | NL      | NAO     | 14       | 3,44                 | 0,21                  | 4,13                 | 0,22                  | yes  | yes    | no      | yes  | 3    |
|                         | 2011 | NL      | NAO     | 14       | 3,48                 | 0,19                  | 3,92                 | 0,24                  | yes  | yes    | no      | yes  | 3    |
|                         | 2011 | NL      | NAO     | 14       | 3,63                 | 0,17                  | 4,16                 | 0,22                  | yes  | yes    | no      | yes  | 3    |
|                         | 2011 | NL      | NAO     | 14       | 3,63                 | 0,22                  | 4,26                 | 0,17                  | yes  | yes    | no      | yes  | 3    |
|                         | 2011 | NL      | NAO     | 14       | 3,46                 | 0,2                   | 4,14                 | 0,22                  | yes  | yes    | no      | yes  | 3    |
|                         | 2011 | NL      | NAO     | 14       | 3,57                 | 0,21                  | 4,2                  | 0,2                   | yes  | yes    | no      | yes  | 3    |
|                         | 2011 | NL      | NAO     | 14       | 3,33                 | 0,17                  | 3,9                  | 0,2                   | yes  | yes    | no      | yes  | 3    |
|                         | 2011 | NL      | NAO     | 14       | 3,35                 | 0,22                  | 3,92                 | 0,24                  | yes  | yes    | no      | yes  | 3    |
|                         | 2011 | NL      | NAO     | 14       | 3,58                 | 0,19                  | 4,04                 | 0,24                  | yes  | yes    | no      | yes  | 3    |
| Foster et al. (2012)    | 2012 |         | JAMES   | 31       | 2,39                 | 0,13                  | 3,73                 | 0,17                  | yes  | yes    | yes     | no   | 4    |
| Fu et al. (2020)        | 2020 | JP      | CommU   | 12       | 2,81                 | 0,2                   | 3,57                 | 0,28                  | yes  | no     | yes     | no   | 1    |
|                         | 2020 | JP      | CommU   | 12       | 2,05                 | 0,17                  | 2,66                 | 0,23                  | yes  | no     | yes     | no   | 1    |
|                         | 2020 | JP      | CommU   | 12       | 3,28                 | 0,21                  | 4,07                 | 0,15                  | yes  | no     | yes     | no   | 1    |
|                         | 2020 | JP      | CommU   | 12       | 2,23                 | 0,16                  | 3,7                  | 0,17                  | yes  | no     | yes     | no   | 1    |
| Ghiglino et al. (2020)  | 2020 | IT      | iCub    | 40       | 3,08                 | 0,31                  | 4,37                 | 0,22                  | yes  | yes    | no      | yes  | 3    |
|                         | 2020 | IT      | iCub    | 40       | 2,98                 | 0,31                  | 4,35                 | 0,27                  | yes  | yes    | no      | yes  | 3    |
|                         | 2020 | IT      | iCub    | 39       | 3,3                  | 0,25                  | 3,96                 | 0,19                  | yes  | yes    | no      | yes  | 3    |
|                         | 2020 | IT      | iCub    | 39       | 2,68                 | 0,22                  | 3,77                 | 0,18                  | yes  | yes    | no      | yes  | 3    |

| Study                      | Year | Country | Robot      | <i>N</i> | <i>M<sub>A</sub></i> | <i>SE<sub>A</sub></i> | <i>M<sub>L</sub></i> | <i>SE<sub>L</sub></i> | Real | Moving | Talking | Plot | Bias |
|----------------------------|------|---------|------------|----------|----------------------|-----------------------|----------------------|-----------------------|------|--------|---------|------|------|
| Giuliani et al (2013)      | 2013 |         | JAMES      | 14       | 1.99                 | 0.16                  | 2.63                 | 0.30                  | yes  | yes    | yes     | no   | 3    |
|                            | 2013 |         | JAMES      | 26       | 1.72                 | 0.11                  | 3.44                 | 0.17                  | yes  | yes    | yes     | no   | 3    |
| Ham et al. (2015)          | 2015 | SG      | NAO        | 16       | 2.17                 | 0.12                  | 3.52                 | 0.09                  | yes  | yes    | no      | yes  | 3    |
|                            | 2015 | SG      | NAO        | 16       | 2.44                 | 0.14                  | 3.49                 | 0.16                  | yes  | yes    | no      | yes  | 3    |
|                            | 2015 | SG      | NAO        | 16       | 2.46                 | 0.16                  | 3.54                 | 0.12                  | yes  | yes    | no      | yes  | 3    |
|                            | 2015 | SG      | NAO        | 16       | 2.30                 | 0.16                  | 3.68                 | 0.23                  | yes  | yes    | no      | yes  | 3    |
| Haring et al. (2015)       | 2015 | JP      | Robi       | 20       | 2.54                 | 0.13                  | 3.8                  | 0.19                  | yes  | yes    | no      | no   | 2    |
|                            | 2015 | JP      | Robi       | 20       | 3.10                 | 0.11                  | 4.36                 | 0.15                  | yes  | yes    | yes     | no   | 2    |
|                            | 2015 | JP      | Robi       | 20       | 3.20                 | 0.17                  | 4.54                 | 0.11                  | yes  | yes    | yes     | no   | 2    |
|                            | 2015 | AU      | Robi       | 22       | 2.71                 | 0.13                  | 4.07                 | 0.13                  | yes  | yes    | no      | no   | 2    |
|                            | 2015 | AU      | Robi       | 22       | 2.64                 | 0.19                  | 4.24                 | 0.16                  | yes  | yes    | yes     | no   | 2    |
|                            | 2015 | AU      | Robi       | 22       | 2.96                 | 0.22                  | 4.09                 | 0.25                  | yes  | yes    | yes     | no   | 2    |
| Haring et al. (2016)       | 2016 | JP / AU | Geminoid-F | 121      | 3.13                 | 0.14                  | 3.05                 | 0.11                  | yes  | yes    | yes     | no   | 4    |
|                            | 2016 | JP / AU | Robi       | 64       | 2.31                 | 0.10                  | 4.11                 | 0.11                  | yes  | yes    | yes     | no   | 4    |
|                            | 2016 | JP / AU | My Keepon  | 62       | 2.54                 | 0.10                  | 3.88                 | 0.10                  | yes  | no     | no      | no   | 4    |
| Hoegen (2013)              | 2013 | NL      | Magabot    | 10       | 2.47                 | 0.15                  | 4.00                 | 0.15                  | yes  | yes    | yes     | no   | 3    |
|                            | 2013 | NL      | Magabot    | 11       | 1.97                 | 0.19                  | 3.51                 | 0.14                  | yes  | yes    | yes     | no   | 3    |
| Iwashita & Katagami (2020) | 2020 | JP      | Pepper     | 16       | 3.69                 | 0.09                  | 3.89                 | 0.11                  | yes  | yes    | yes     | yes  | 3    |
|                            | 2020 | JP      | Pepper     | 16       | 3.64                 | 0.09                  | 3.98                 | 0.09                  | yes  | yes    | yes     | yes  | 3    |
|                            | 2020 | JP      | Pepper     | 16       | 2.40                 | 0.16                  | 3.11                 | 0.13                  | yes  | yes    | yes     | yes  | 3    |
| Johansson et al. (2020)    | 2020 | NZ      | EveR-4     | 46       | 2.19                 | 0.10                  | 3.62                 | 0.13                  | yes  | yes    | yes     | no   | 4    |
|                            | 2020 | NZ      | EveR-4     | 46       | 2.66                 | 0.13                  | 4.06                 | 0.11                  | yes  | yes    | yes     | no   | 4    |
|                            | 2020 | NZ      | EveR-4     | 45       | 2.14                 | 0.10                  | 3.78                 | 0.12                  | yes  | yes    | yes     | no   | 4    |
|                            | 2020 | NZ      | EveR-4     | 45       | 2.61                 | 0.12                  | 3.91                 | 0.11                  | yes  | yes    | yes     | no   | 4    |
| Keizer et al. (2014)       | 2014 | DE      | JAMES      | 24       | 2.07                 | 0.22                  | 3.53                 | 0.20                  | yes  | yes    | yes     | no   | 4    |
| Kerzel et al. (2020)       | 2020 | DE      | NICO       | 12       | 2.62                 | 0.29                  | 4.19                 | 0.25                  | yes  | yes    | yes     | no   | 3    |
|                            | 2020 | DE      | NICO       | 12       | 2.55                 | 0.32                  | 4.23                 | 0.21                  | yes  | yes    | no      | no   | 3    |
| Kühnlentz (2013)           | 2013 | DE      | EDDIE      | 21       | 3.13                 | 0.17                  | 3.90                 | 0.13                  | yes  | yes    | yes     | no   | 3    |
|                            | 2013 | DE      | EDDIE      | 22       | 3.07                 | 0.15                  | 3.93                 | 0.12                  | yes  | yes    | yes     | no   | 3    |
|                            | 2013 | DE      | EDDIE      | 21       | 2.73                 | 0.17                  | 3.81                 | 0.17                  | yes  | yes    | yes     | no   | 3    |

| Study                  | Year | Country | Robot                 | $N$ | $M_A$ | $SE_A$ | $M_L$ | $SE_L$ | Real | Moving | Talking | Plot | Bias |
|------------------------|------|---------|-----------------------|-----|-------|--------|-------|--------|------|--------|---------|------|------|
| Kühnlenz et al. (2013) | 2013 | DE      | EDDIE                 | 20  | 2.36  | 0.15   | 3.83  | 0.18   | yes  | yes    | yes     | no   | 3    |
|                        | 2013 | DE      | EDDIE                 | 13  | 2.60  | 0.17   | 3.5   | 0.31   | yes  | yes    | yes     | no   | 3    |
|                        | 2013 | DE      | EDDIE                 | 25  | 2.80  | 0.10   | 4.10  | 0.10   | yes  | yes    | yes     | no   | 3    |
| Lehmann et al. (2016)  | 2013 | DE      | EDDIE                 | 17  | 2.80  | 0.17   | 4.10  | 0.17   | yes  | yes    | yes     | no   | 3    |
|                        | 2016 |         | iCub                  | 14  | 2.63  | 0.06   | 4.11  | 0.05   | no   | no     | yes     | no   | 1    |
|                        | 2016 |         | iCub                  | 14  | 2.71  | 0.11   | 4.16  | 0.04   | no   | yes    | yes     | no   | 1    |
| Lehmann et al. (2020)  | 2016 |         | iCub                  | 14  | 2.65  | 0.12   | 4.08  | 0.03   | no   | yes    | yes     | no   | 1    |
|                        | 2020 | CZ      | NAO                   | 40  | 2.93  | 0.12   | 3.57  | 0.16   | yes  | yes    | no      | no   | 3    |
|                        | 2020 | CZ      | NAO                   | 40  | 3.02  | 0.16   | 3.59  | 0.15   | yes  | yes    | no      | no   | 3    |
| Löffler et al. (2019)  | 2020 | CZ      | NAO                   | 40  | 2.90  | 0.14   | 3.47  | 0.15   | yes  | yes    | no      | no   | 3    |
|                        | 2019 | DE      | BlessU2               | 41  | 2.04  | 0.01   | 4.11  | 0.06   | yes  | yes    | yes     | yes  | 3    |
|                        | 2019 | DE      | QT                    | 41  | 2.11  | 0.02   | 3.98  | 0.06   | yes  | yes    | yes     | yes  | 3    |
| Lohse et al. (2013)    | 2013 | NL      | Magabot               | 40  | 2.54  | 0.11   | 3.54  | 0.09   | yes  | yes    | no      | no   | 3    |
| Lugrin et al. (2018)   | 2018 | DE      | Robopec Reeti         | 20  | 2.31  | 0.21   | 3.74  | 0.23   | yes  | yes    | yes     | no   | 3    |
|                        | 2018 | DE      | Robopec Reeti         | 20  | 2.55  | 0.19   | 3.97  | 0.17   | yes  | yes    | yes     | no   | 3    |
| Mazzola et al. (2020)  | 2020 | IT      | iCub                  | 25  | 2.90  | 0.19   | 4.16  | 0.21   | yes  | yes    | yes     | no   | 5    |
|                        | 2020 | IT      | iCub                  | 25  | 2.06  | 0.16   | 3.27  | 0.24   | yes  | yes    | no      | no   | 5    |
| Meghdari et al. (2018) | 2018 | IR      | Arash                 | 14  | 4.14  | 0.21   | 4.90  | 0.08   | yes  | yes    | yes     | no   | 2    |
| Mirnig et al. (2017a)  | 2017 | AT      | NAO                   | 21  | 1.97  | 0.14   | 4.30  | 0.11   | yes  | yes    | yes     | no   | 4    |
|                        | 2017 | AT      | NAO                   | 24  | 2.33  | 0.16   | 3.93  | 0.14   | yes  | yes    | yes     | no   | 4    |
| Mirnig et al. (2017b)  | 2017 | AT      | NAO                   | 113 | 2.1   | 0.12   | 3.6   | 0.13   | no   | yes    | yes     | no   | 3    |
| Moon et al. (2013)     | 2013 | UK      | Barrett WAM robot     | 24  | 2.48  | 0.18   | 2.68  | 0.17   | yes  | yes    | no      | yes  | 4    |
|                        | 2013 | UK      | Barrett WAM robot     | 24  | 2.91  | 0.18   | 2.98  | 0.20   | yes  | yes    | no      | yes  | 4    |
|                        | 2013 | UK      | Barrett WAM robot     | 24  | 3.03  | 0.14   | 3.67  | 0.16   | yes  | yes    | no      | yes  | 4    |
|                        | 2013 | UK      | Barrett WAM robot     | 24  | 3.28  | 0.18   | 3.79  | 0.15   | yes  | yes    | no      | yes  | 4    |
|                        | 2013 | UK      | Barrett WAM robot     | 24  | 2.90  | 0.16   | 3.41  | 0.14   | yes  | yes    | no      | yes  | 4    |
|                        | 2013 | UK      | Barrett WAM robot     | 24  | 3.09  | 0.18   | 3.72  | 0.16   | yes  | yes    | no      | yes  | 4    |
| Müller et al. (2017)   | 2017 | DE      | Virtual reality robot | 76  | 2.06  | 0.08   | 3.19  | 0.07   | no   | yes    | no      | no   | 2    |
|                        | 2017 | DE      | Virtual reality robot | 76  | 2.38  | 0.12   | 3.78  | 0.08   | no   | yes    | no      | no   | 2    |
| Paetzel et al. (2020)  | 2020 | SE      | Furhead               | 16  | 3.65  | 0.17   | 3.50  | 0.17   | yes  | yes    | yes     | no   | 5    |

| Study                                  | Year | Country | Robot                   | <i>N</i> | <i>M<sub>A</sub></i> | <i>SE<sub>A</sub></i> | <i>M<sub>L</sub></i> | <i>SE<sub>L</sub></i> | Real | Moving | Talking | Plot | Bias |
|----------------------------------------|------|---------|-------------------------|----------|----------------------|-----------------------|----------------------|-----------------------|------|--------|---------|------|------|
| Petрак et al. (2019)                   | 2020 | SE      | Furhead                 | 16       | 2.97                 | 0.17                  | 2.87                 | 0.16                  | yes  | yes    | yes     | no   | 5    |
|                                        | 2019 | DE      | Virtual reality robot   | 16       | 3.13                 | 0.22                  | 4.24                 | 0.16                  | no   | yes    | no      | no   | 3    |
|                                        | 2019 | DE      | Virtual reality robot   | 16       | 2.36                 | 0.26                  | 2.82                 | 0.27                  | no   | yes    | no      | no   | 3    |
| Rhim et al. (2019)                     | 2019 |         | Pepper                  | 40       | 3.25                 | 0.14                  | 4.38                 | 0.10                  | yes  | yes    | yes     | no   | 3    |
|                                        | 2019 |         | Pepper                  | 38       | 3.45                 | 0.12                  | 4.32                 | 0.11                  | yes  | yes    | yes     | no   | 3    |
| Rosenberg-Kima et al. (2020)           | 2020 | IS      | NAO                     | 36       | 2.51                 | 0.11                  | 3.64                 | 0.12                  | yes  | yes    | yes     | no   | 3    |
| Rosenthal-von der Pütten et al. (2017) | 2017 | DE      | NAO                     | 20       | 2.01                 | 0.22                  | 4.06                 | 0.17                  | yes  | yes    | yes     | no   | 4    |
|                                        | 2017 | DE      | NAO                     | 20       | 2.26                 | 0.22                  | 4.44                 | 0.16                  | yes  | yes    | yes     | no   | 4    |
|                                        | 2017 | DE      | NAO                     | 20       | 2.01                 | 0.17                  | 4.98                 | 0.18                  | yes  | yes    | yes     | no   | 4    |
|                                        | 2017 | DE      | NAO                     | 20       | 2.33                 | 0.23                  | 4.31                 | 0.15                  | yes  | yes    | yes     | no   | 4    |
|                                        | 2017 | DE      | NAO                     | 20       | 2.4                  | 0.19                  | 4.14                 | 0.15                  | yes  | yes    | yes     | no   | 4    |
| Rosenthal-von der Pütten et al. (2018) | 2017 | DE      | NAO                     | 20       | 2.69                 | 0.19                  | 4.48                 | 0.09                  | yes  | yes    | yes     | no   | 4    |
|                                        | 2018 | DE      | NAO                     | 20       | 2.10                 | 0.20                  | 3.90                 | 0.20                  | yes  | no     | yes     | no   | 4    |
|                                        | 2018 | DE      | NAO                     | 20       | 2.30                 | 0.16                  | 4.10                 | 0.16                  | yes  | no     | yes     | no   | 4    |
|                                        | 2018 | DE      | NAO                     | 20       | 2.50                 | 0.25                  | 4.20                 | 0.18                  | yes  | yes    | yes     | no   | 4    |
|                                        | 2018 | DE      | NAO                     | 20       | 2.50                 | 0.22                  | 4.20                 | 0.13                  | yes  | yes    | yes     | no   | 4    |
| Ruitjen & Cuijpers (2018)              | 2018 |         | Drone                   | 64       | 2.13                 | 0.13                  | 2.99                 | 0.13                  | no   | no     | no      | no   | 3    |
|                                        | 2018 |         | Drone                   | 64       | 2.48                 | 0.14                  | 3.49                 | 0.14                  | no   | yes    | no      | no   | 3    |
|                                        | 2018 |         | Drone                   | 58       | 2.63                 | 0.12                  | 3.72                 | 0.11                  | no   | no     | no      | no   | 3    |
|                                        | 2018 |         | Drone                   | 58       | 2.86                 | 0.13                  | 3.83                 | 0.11                  | no   | yes    | no      | no   | 3    |
| Schneider (2019)                       | 2019 |         | NAO                     | 20       | 2.62                 | 0.19                  | 4.73                 | 0.08                  | yes  | yes    | yes     | no   | 6    |
|                                        | 2019 |         | NAO                     | 20       | 2.35                 | 0.14                  | 4.52                 | 0.13                  | yes  | yes    | yes     | no   | 6    |
| Shariati et al. (2018)                 | 2018 | IR      | Arash                   | 20       | 3.99                 | 0.19                  | 4.84                 | 0.08                  | yes  | yes    | yes     | no   | 3    |
|                                        | 2018 | IR      | Arash                   | 20       | 3.82                 | 0.18                  | 4.81                 | 0.07                  | no   | yes    | yes     | no   | 3    |
| Straßmann et al. (2020)                | 2020 | DE      | Pepper                  | 22       | 2.27                 | 0.19                  | 3.80                 | 0.16                  | yes  | no     | yes     | no   | 4    |
|                                        | 2020 | DE      | Pepper                  | 22       | 2.53                 | 0.12                  | 4.11                 | 0.14                  | yes  | no     | yes     | no   | 4    |
|                                        | 2020 | DE      | Pepper                  | 22       | 2.13                 | 0.14                  | 3.72                 | 0.14                  | no   | no     | yes     | no   | 4    |
|                                        | 2020 | DE      | Pepper                  | 22       | 1.96                 | 0.13                  | 3.66                 | 0.13                  | no   | no     | yes     | no   | 4    |
| Syrdal et al. (2013)                   | 2013 | UK      | Sunflower housing robot | 8        | 3.20                 | 0.38                  | 4.38                 | 0.06                  | yes  | yes    | no      | no   | 2    |
|                                        | 2013 | UK      | Sunflower housing robot | 8        | 2.88                 | 0.35                  | 3.93                 | 0.07                  | yes  | no     | no      | no   | 2    |



| Study                      | Year | Country | Robot      | <i>N</i> | <i>M<sub>A</sub></i> | <i>SE<sub>A</sub></i> | <i>M<sub>L</sub></i> | <i>SE<sub>L</sub></i> | Real | Moving | Talking | Plot | Bias |
|----------------------------|------|---------|------------|----------|----------------------|-----------------------|----------------------|-----------------------|------|--------|---------|------|------|
| Trovato et al. (2015a)     | 2015 | BR      | KOBIAN     | 40       | 2.59                 | 0.15                  | 3.56                 | 0.12                  | no   | no     | yes     | no   | 6    |
| Trovato et al. (2015b)     | 2015 | BR      | KOBIAN     | 20       | 1.20                 | 0.20                  | 4.65                 | 0.22                  | no   | no     | yes     | no   | 6    |
| Ueno et al. (2020)         | 2020 | CZ      | Robot hand | 23       | 2.93                 | 0.19                  | 3.30                 | 0.17                  | yes  | no     | no      | yes  | 3    |
| Van der Hout (2017)        | 2017 | NL      | NAO        | 67       | 2.21                 | 0.11                  | 3.67                 | 0.10                  | yes  | yes    | yes     | no   | 4    |
|                            | 2017 | NL      | NAO        | 67       | 2.43                 | 0.11                  | 3.70                 | 0.11                  | yes  | yes    | yes     | no   | 4    |
| Wieser et al. (2016)       | 2016 |         | IRMA       | 20       | 2.95                 | 0.15                  | 4.28                 | 0.13                  | yes  | yes    | no      | no   | 4    |
| Willemse & Wykowska (2019) | 2019 | IT      | iCub       | 25       | 3.34                 | 0.14                  | 4.10                 | 0.14                  | yes  | yes    | yes     | no   | 4    |
|                            | 2019 | IT      | iCub       | 25       | 3.24                 | 0.16                  | 3.74                 | 0.15                  | yes  | yes    | yes     | no   | 4    |
| Zanatto et al. (2019)      | 2019 | UK      | NAO        | 48       | 2.39                 | 0.11                  | 4.27                 | 0.15                  | yes  | yes    | yes     | no   | 5    |
|                            | 2019 | UK      | NAO        | 48       | 2.55                 | 0.13                  | 3.99                 | 0.12                  | yes  | no     | no      | no   | 5    |
| Zanatto et al. (2020)      | 2020 | UK      | NAO        | 30       | 2.08                 | 0.10                  | 3.57                 | 0.07                  | yes  | yes    | no      | no   | 3    |
|                            | 2020 | UK      | NAO        | 29       | 2.71                 | 0.10                  | 3.66                 | 0.11                  | yes  | yes    | no      | no   | 3    |
|                            | 2020 | UK      | NAO        | 30       | 2.02                 | 0.10                  | 4.14                 | 0.08                  | yes  | yes    | no      | no   | 3    |

*Note.*  $M_{A/L}$  = Mean anthropomorphism (A) or likability (L) score.  $SE_{A/L}$  = Standard error for  $M_{A/L}$ . Real = Participants interacted with a real robot as compared to a photo or video. Plot = Statistics were reproduced from plots. Bias = Risk of bias using the ROBUST (Nudelman & Otto, 2020) codings.

### Reliability Generalizations

The coefficient alpha reliabilities were pooled across samples with a random-effects meta-analysis using restricted maximum likelihood estimation. Because raw coefficient alphas are not normally distributed, we used the transformation and large sample variances suggested by Hakistan and Whalen (1976). To account for different test lengths (i.e., samples administering short versions), the coefficient alphas were corrected to a length of 5 items (i.e., as in the original scales) using the Spearman-Brown prophecy formula. Moreover, the average score variances were included as moderators in the meta-analytic models to adjust for range restriction (cf. Rodriguez & Maeda, 2006). The results of the two reliability generalizations in Table E1 show that both scales were generally reliable with pooled coefficient alphas of .85 and .88 for anthropomorphism and likability, respectively. For anthropomorphism, there was little variation between samples as indicated by the non-significant random component and the small value of  $I^2$ . Although the respective effect was slightly larger for likability ( $I^2 = 34\%$ ), unaccounted differences between samples can be considered moderate. Overall, these analyses highlight that, on average, both Godspeed scales exhibited satisfactory reliabilities in the studied samples.

**Table E1**

*Reliability Generalizations of the Godspeed Anthropomorphism and Likability Scales*

|                                | Anthropomorphism                | Likability                      |
|--------------------------------|---------------------------------|---------------------------------|
| Number of samples              | 34                              | 34                              |
| Pooled coefficient alpha       | .850                            | .883                            |
| 95% Confidence interval        | [.830, .869]                    | [.867, .899]                    |
| 95% Credibility interval       | [.796, .894]                    | [.819, .930]                    |
| $I^2$                          | 17.23%                          | 34.03%                          |
| Test of residual heterogeneity | $Q(df = 32) = 35.817, p = .294$ | $Q(df = 27) = 45.019, p = .063$ |
| Test of moderator effects      | $Q_m(df = 1) = 3.125, p = .077$ | $Q_m(df = 1) = 0.328, p = .567$ |

### **Meta-Analyses of Godspeed Scale Scores by Robot**

Differences in anthropomorphism and likability ratings between different robot models were examined by meta-analytically pooling the coded mean scores and using the robot model as a predictor in a meta-regression. We distinguished six robots for which ratings from at least three independent samples were available: the bartender robot JAMES (e.g., Foster et al., 2012; Giuliani et al., 2013), the iCub robot by the Italian Institute of Technology (e.g., Mazzola et al., 2020), the Magabot robot (e.g., Lohse et al., 2013), the NAO robot by SoftBank Robotics (e.g., Cuijpers et al., 2011), the neuro-inspired companion robot NICO by the Knowledge Technology group at the University of Hamburg (e.g., Kerzel et al., 2020), and the Pepper robot by SoftBank Robotics (e.g., Iwashita and Katagami, 2020). To correct for potential setting effects, the presentation mode (real versus other) and whether the robot moved or communicated were included as covariates. The covariates were dummy coded, while the robot model was effect-coded to determine the difference of a specific model from the overall mean rating. For each scale, results of two meta-analytic models are presented (see Table E2): (a) a model that included only the covariates (Model 1) and (b) a model that additionally accounted for differences between the six robot models (Model 2).

The pooled anthropomorphism score across all robot models was  $\mu = 2.64$ , 95% CI [2.52, 2.76]. In line with Mori's hypothesis (Mori et al., 2012), moving robots were evaluated more human-like as compared to static robots. Moreover, robots seemed to be attributed more human-like characteristics when respondents interacted with a real robot as compared to simply viewing photos or videos of a robot. However, these effects were only significant after accounting for differences between robot types (Model 2). We also observed significant differences in anthropomorphism ratings between robot models. While the bartender robot JAMES was evaluated significantly less human-like as compared to the average evaluation, the iCub robot and Pepper were evaluated significantly more human-like (see Table E2). The

robot model accounted for about 20% in the random variance of anthropomorphism ratings between samples.

The pooled likability score across all robot models was  $\mu = 4.04$ , 95% CI [3.93, 4.14]. Robots that communicated with the respondents (e.g., talked) were evaluated significantly ( $p < .05$ ) more likeable as compared to mute robots. Again, we also observed significant differences in likability ratings between robot models. While the bartender robot JAMES was evaluated significantly less likeable as compared to the average evaluation, the NAO robot was evaluated significantly more likeable (see Table E2). The robot model explained about 4% in the random variance of likability ratings between samples.

**Table E2**

*Meta-Analyses of Godspeed Scale Scores by Robot Model*

|                                | <i>Anthropomorphism</i>    |                            | <i>Likability</i>          |                             |
|--------------------------------|----------------------------|----------------------------|----------------------------|-----------------------------|
|                                | Model 1                    | Model 2                    | Model 1                    | Model 2                     |
| Intercept                      | 2.64 <sup>***</sup> (0.06) | 2.61 <sup>***</sup> (0.07) | 4.04 <sup>***</sup> (0.05) | 3.95 <sup>***</sup> (0.07)  |
| Bartender robot <sup>c</sup>   |                            | -0.57 <sup>**</sup> (0.20) |                            | -0.57 <sup>**</sup> (0.20)  |
| iCub robot <sup>c</sup>        |                            | 0.39 <sup>**</sup> (0.15)  |                            | 0.25 <sup>+</sup> (0.14)    |
| Magabot robot <sup>c</sup>     |                            | -0.28 (0.22)               |                            | -0.18 (0.21)                |
| NAO robot <sup>c</sup>         |                            | -0.14 (0.09)               |                            | 0.17 <sup>*</sup> (0.09)    |
| NICO robot <sup>c</sup>        |                            | -0.04 (0.20)               |                            | 0.16 (0.19)                 |
| Pepper robot <sup>c</sup>      |                            | 0.40 <sup>*</sup> (0.16)   |                            | 0.10 (0.15)                 |
| Presentation mode <sup>a</sup> | -0.17 (0.13)               | -0.36 <sup>**</sup> (0.13) | -0.10 (0.11)               | -0.12 (0.11)                |
| Moving <sup>b</sup>            | -0.22 <sup>+</sup> (0.12)  | -0.32 <sup>**</sup> (0.12) | -0.15 (0.11)               | -0.16 (0.11)                |
| Communicating <sup>b</sup>     | 0.03 (0.10)                | 0.03 (0.03)                | -0.26 <sup>**</sup> (0.08) | -0.29 <sup>***</sup> (0.08) |
| Random effect ( $\tau^2$ )     | 0.36 / 0.27                | 0.31 / 0.25                | 0.30 / 0.25                | 0.29 / 0.25                 |
| $I^2$                          | 95%                        | 93%                        | 96%                        | 95%                         |
| $R^2$                          | 3%                         | 23%                        | 9%                         | 13%                         |

*Note.* Presented are meta-regression coefficients with standard errors in parentheses.

<sup>a</sup> 0 = physical, 1 = other ; <sup>b</sup> 0 = yes, 1 = no; <sup>c</sup> Effect-coded with other robots as reference category.

<sup>\*\*\*</sup>  $p < .001$ , <sup>\*\*</sup>  $p < .01$ , <sup>\*</sup>  $p < .05$ , <sup>+</sup>  $p < .10$

### Analysis of Publication Bias

The presence and consequence of a potential publication bias were examined separately for the two Godspeed scales. The funnel plots in Figure E1 indicated a slightly asymmetric shape for the likability scores. However, this might be a consequence of a ceiling effect because many scores clustered in the upper region at the border of the scale limit. For anthropomorphism scores, a visual inspection of the funnel plot did not indicate a pronounced asymmetry.

**Figure E1**

*Funnel Plots for Average Anthropomorphism and Likability Scores*

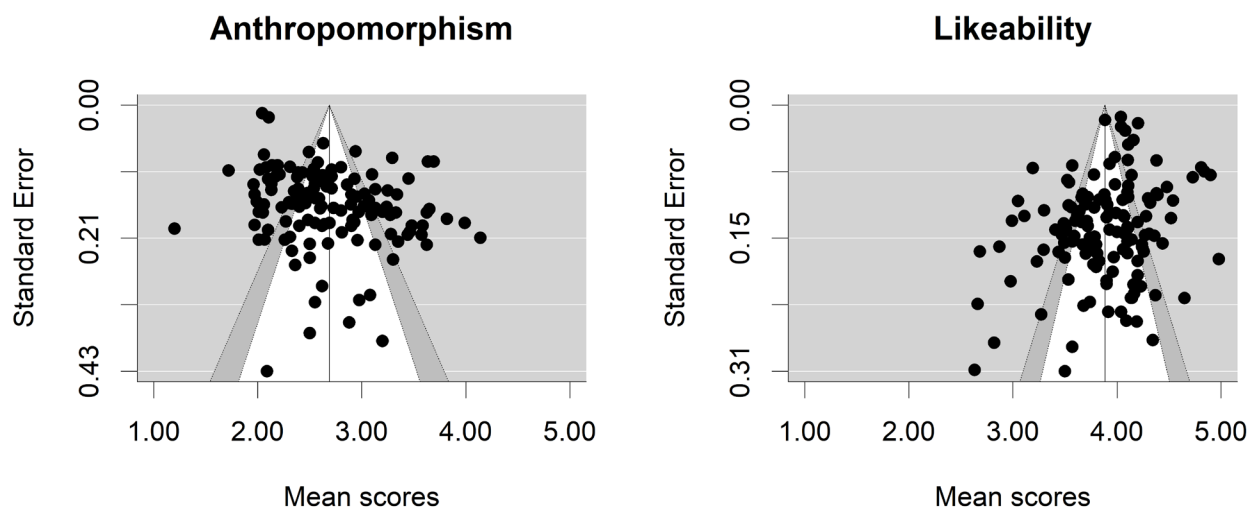

The shapes of the funnel plots were tested for asymmetry using a regression test (Egger, Smith, Schneider, & Minder, 1997; Stanley, 2008) that predicted the mean scores from their standard errors. A significant effect would indicate an asymmetric shape of the funnel plot and potentially selective reporting. For anthropomorphism, the regression test suggested a skewed funnel plot (see Table E3). The pooled effect corrected for selective reporting ( $\mu = 2.10$ ) was slightly smaller than the uncorrected effect ( $\mu = 2.36$ ), indicating that some studies with low anthropomorphism ratings might be missing from the meta-analytic

database. In contrast for likability, the test for funnel plot asymmetry was not significant ( $p = .058$ ). Moreover, the corrected ( $\mu = 4.06$ ) and uncorrected effect ( $\mu = 4.01$ ) were rather similar which does not suggest pronounced reporting bias. Taken together, these analyses suggest that publication bias might have slightly distorted the publicly available research findings regarding anthropomorphism but did not give evidence of distortions for likability ratings.

**Table E3**

*Regression Tests for Funnel Plot Asymmetry of the Godspeed Scale Scores*

|                | <i>Anthropomorphism</i>    |                            | <i>Likability</i>          |                            |
|----------------|----------------------------|----------------------------|----------------------------|----------------------------|
|                | Model 1                    | Model 2                    | Model 1                    | Model 2                    |
| Intercept      | 2.36 <sup>***</sup> (0.04) | 2.10 <sup>***</sup> (0.06) | 4.01 <sup>***</sup> (0.03) | 4.06 <sup>***</sup> (0.04) |
| Standard error |                            | 3.22 <sup>***</sup> (0.55) |                            | -1.04 <sup>+</sup> (0.54)  |

<sup>\*\*\*</sup>  $p < .001$ , <sup>\*\*</sup>  $p < .01$ , <sup>\*</sup>  $p < .05$ , <sup>+</sup>  $p < .10$

### **Identification of Nonlinearity**

The optimal number of higher-order polynomials predicting likability from anthropomorphism was identified by comparing increasingly complex models. Models including polynomials of degree 1 to degree 6 resulted in Bayesian information criteria (BIC; Schwarz, 1978) of 130, 130, 129, 133, 138, and 142, respectively. The lowest BIC was observed for a model including polynomials of degree 3. The results of respective meta-regression analyses are summarized in Table 2.

**Sensitivity Analyses**

Following Voracek and colleagues (2019), we tried to determine the generalizability of the results with regard to various methodological choices. First, we repeated the meta-analyses excluding samples with children (Meghdari et al., 2018; Shariati et al., 2018) or older respondents (Rosenthal-von der Pütten et al., 2017). Because most studies relied on student samples that were rather homogenous regarding mean age, children and seniors might distort the effect estimates. However, the predicted effect with and without these samples was highly similar and replicated the curvilinear association between anthropomorphism and likability (see left panel in Figure E2). Then, we identified outliers using studentized residuals (cf. Viechtbauer & Cheung, 2010) and repeated the analyses excluding the three identified extreme values (Haring et al., 2016; Paetzel et al., 2020; Rosenthal-von der Pütten et al., 2017). Again, the resulted predicted effects between anthropomorphism and likability closely replicated the overall analyses (see right panel in Figure E2).

**Figure E2**

*Predicted Effects Excluding Young and Old Samples or Outliers*

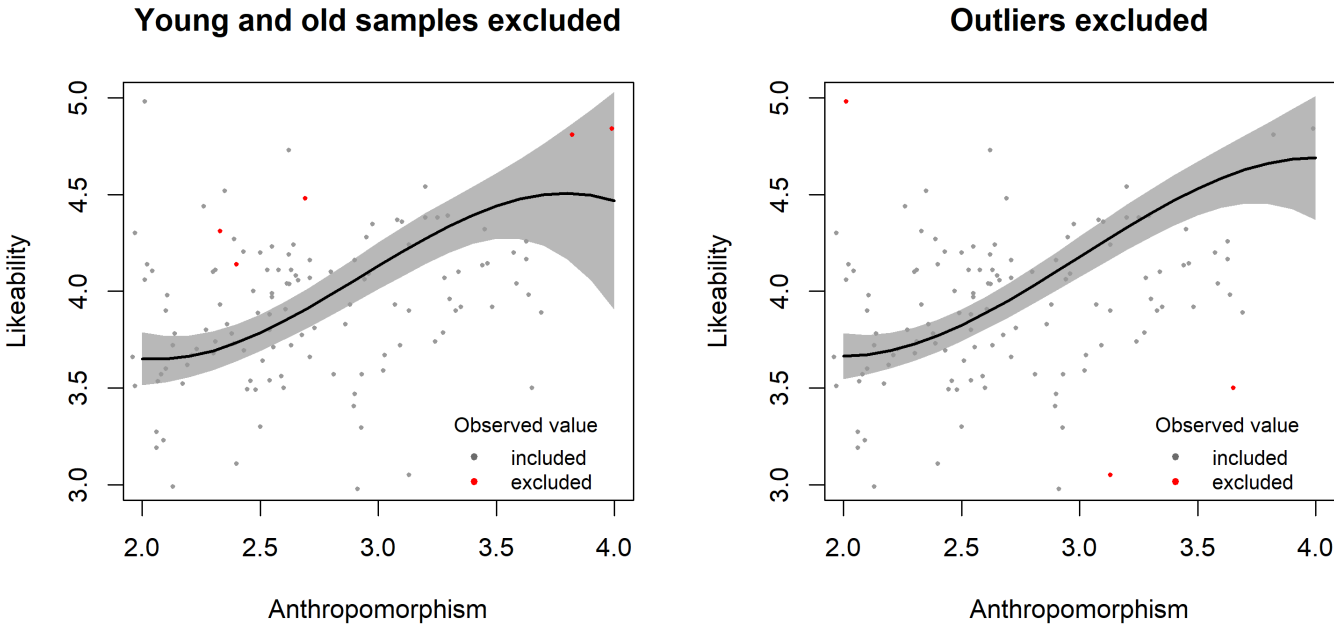



Finally, we estimated meta-analytic models with cluster-robust standard errors (cf. Hedges et al., 2010). This involves two steps: First, preliminary standard errors are estimated using a working model that specifies a hypothesized dependency structure between observed effects. Then, the estimated standard errors are corrected for remaining unmodeled (unknown) dependencies using a sandwich estimator. Following Pustejovsky and Tipton (2021), we adopted three different working models that either assumed correlated effects, a hierarchical effect structure, or both. The predicted associations between likability and anthropomorphism for these analyses estimated with the *clubSandwich* package version 0.5.3 (Pustejovsky, 2021) are presented in Figure E3. Generally, the different modeling strategies lead to similar results; albeit ignoring a hierarchical effect structure seemed to exhibit a somewhat flatter increase. Thus, the choice of the analysis model does not substantially impact the observed results.

**Figure E3**

*Predicted Effects Using Robust Meta-Analyses with Different Working Models*

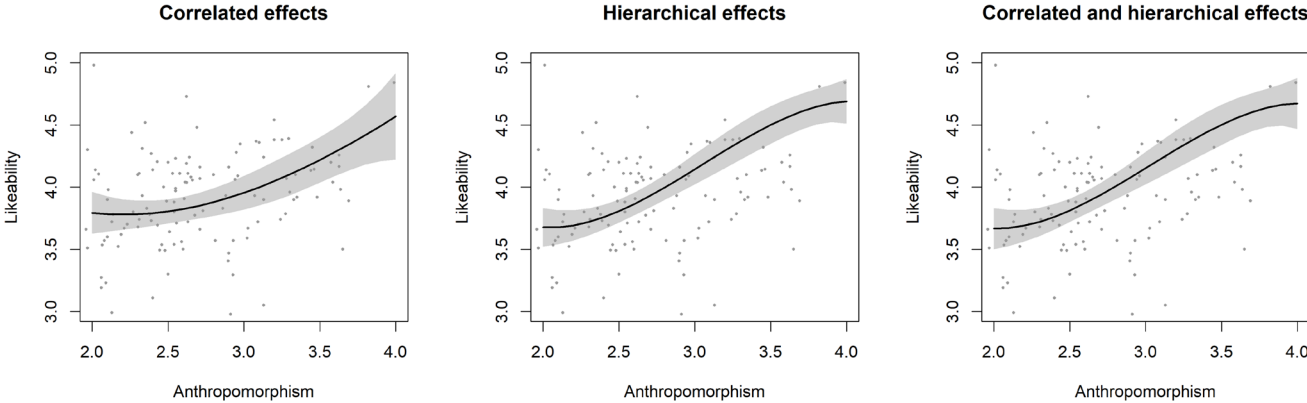

**PRISMA 2020 Checklist**

| Section and Topic             | Item # | Checklist item                                                                                                                                                                                                                                                                                       | Location where item is reported |
|-------------------------------|--------|------------------------------------------------------------------------------------------------------------------------------------------------------------------------------------------------------------------------------------------------------------------------------------------------------|---------------------------------|
| <b>TITLE</b>                  |        |                                                                                                                                                                                                                                                                                                      |                                 |
| Title                         | 1      | Identify the report as a systematic review.                                                                                                                                                                                                                                                          | Page 3                          |
| <b>ABSTRACT</b>               |        |                                                                                                                                                                                                                                                                                                      |                                 |
| Abstract                      | 2      | See the PRISMA 2020 for Abstracts checklist.                                                                                                                                                                                                                                                         | Page 2                          |
| <b>INTRODUCTION</b>           |        |                                                                                                                                                                                                                                                                                                      |                                 |
| Rationale                     | 3      | Describe the rationale for the review in the context of existing knowledge.                                                                                                                                                                                                                          | Page 6                          |
| Objectives                    | 4      | Provide an explicit statement of the objective(s) or question(s) the review addresses.                                                                                                                                                                                                               | Page 7                          |
| <b>METHODS</b>                |        |                                                                                                                                                                                                                                                                                                      |                                 |
| Eligibility criteria          | 5      | Specify the inclusion and exclusion criteria for the review and how studies were grouped for the syntheses.                                                                                                                                                                                          | Page 8                          |
| Information sources           | 6      | Specify all databases, registers, websites, organisations, reference lists and other sources searched or consulted to identify studies. Specify the date when each source was last searched or consulted.                                                                                            | Page 7                          |
| Search strategy               | 7      | Present the full search strategies for all databases, registers and websites, including any filters and limits used.                                                                                                                                                                                 | Page 7                          |
| Selection process             | 8      | Specify the methods used to decide whether a study met the inclusion criteria of the review, including how many reviewers screened each record and each report retrieved, whether they worked independently, and if applicable, details of automation tools used in the process.                     | -                               |
| Data collection process       | 9      | Specify the methods used to collect data from reports, including how many reviewers collected data from each report, whether they worked independently, any processes for obtaining or confirming data from study investigators, and if applicable, details of automation tools used in the process. | Page 9                          |
| Data items                    | 10a    | List and define all outcomes for which data were sought. Specify whether all results that were compatible with each outcome domain in each study were sought (e.g. for all measures, time points, analyses), and if not, the methods used to decide which results to collect.                        | Supplement                      |
|                               | 10b    | List and define all other variables for which data were sought (e.g. participant and intervention characteristics, funding sources). Describe any assumptions made about any missing or unclear information.                                                                                         | Supplement                      |
| Study risk of bias assessment | 11     | Specify the methods used to assess risk of bias in the included studies, including details of the tool(s) used, how many reviewers assessed each study and whether they worked independently, and if applicable, details of automation tools used in the process.                                    | Page 9                          |
| Effect measures               | 12     | Specify for each outcome the effect measure(s) (e.g. risk ratio, mean difference) used in the synthesis or presentation of results.                                                                                                                                                                  | Page 9                          |
| Synthesis methods             | 13a    | Describe the processes used to decide which studies were eligible for each synthesis (e.g. tabulating the study intervention characteristics and comparing against the planned groups for each synthesis (item #5)).                                                                                 | -                               |
|                               | 13b    | Describe any methods required to prepare the data for presentation or synthesis, such as handling of missing summary statistics, or data conversions.                                                                                                                                                | -                               |
|                               | 13c    | Describe any methods used to tabulate or visually display results of individual studies and syntheses.                                                                                                                                                                                               | -                               |
|                               | 13d    | Describe any methods used to synthesize results and provide a rationale for the choice(s). If meta-analysis was performed, describe the model(s), method(s) to identify the presence and extent of statistical heterogeneity, and software package(s) used.                                          | Page 9                          |

| Section and Topic             | Item # | Checklist item                                                                                                                                                                                                                                                                       | Location where item is reported |
|-------------------------------|--------|--------------------------------------------------------------------------------------------------------------------------------------------------------------------------------------------------------------------------------------------------------------------------------------|---------------------------------|
|                               | 13e    | Describe any methods used to explore possible causes of heterogeneity among study results (e.g. subgroup analysis, meta-regression).                                                                                                                                                 | Page 10                         |
|                               | 13f    | Describe any sensitivity analyses conducted to assess robustness of the synthesized results.                                                                                                                                                                                         | Page 10                         |
| Reporting bias assessment     | 14     | Describe any methods used to assess risk of bias due to missing results in a synthesis (arising from reporting biases).                                                                                                                                                              | Supplement                      |
| Certainty assessment          | 15     | Describe any methods used to assess certainty (or confidence) in the body of evidence for an outcome.                                                                                                                                                                                | Page 10                         |
| <b>RESULTS</b>                |        |                                                                                                                                                                                                                                                                                      |                                 |
| Study selection               | 16a    | Describe the results of the search and selection process, from the number of records identified in the search to the number of studies included in the review, ideally using a flow diagram.                                                                                         | Page 11                         |
|                               | 16b    | Cite studies that might appear to meet the inclusion criteria, but which were excluded, and explain why they were excluded.                                                                                                                                                          | -                               |
| Study characteristics         | 17     | Cite each included study and present its characteristics.                                                                                                                                                                                                                            | Supplement                      |
| Risk of bias in studies       | 18     | Present assessments of risk of bias for each included study.                                                                                                                                                                                                                         | Supplement                      |
| Results of individual studies | 19     | For all outcomes, present, for each study: (a) summary statistics for each group (where appropriate) and (b) an effect estimate and its precision (e.g. confidence/credible interval), ideally using structured tables or plots.                                                     | Supplement                      |
| Results of syntheses          | 20a    | For each synthesis, briefly summarise the characteristics and risk of bias among contributing studies.                                                                                                                                                                               | Supplement                      |
|                               | 20b    | Present results of all statistical syntheses conducted. If meta-analysis was done, present for each the summary estimate and its precision (e.g. confidence/credible interval) and measures of statistical heterogeneity. If comparing groups, describe the direction of the effect. | Page 12-14<br>Supplement        |
|                               | 20c    | Present results of all investigations of possible causes of heterogeneity among study results.                                                                                                                                                                                       | Supplement                      |
|                               | 20d    | Present results of all sensitivity analyses conducted to assess the robustness of the synthesized results.                                                                                                                                                                           | Supplement                      |
| Reporting biases              | 21     | Present assessments of risk of bias due to missing results (arising from reporting biases) for each synthesis assessed.                                                                                                                                                              | Supplement                      |
| Certainty of evidence         | 22     | Present assessments of certainty (or confidence) in the body of evidence for each outcome assessed.                                                                                                                                                                                  | Supplement                      |
| <b>DISCUSSION</b>             |        |                                                                                                                                                                                                                                                                                      |                                 |
| Discussion                    | 23a    | Provide a general interpretation of the results in the context of other evidence.                                                                                                                                                                                                    | Page 14/15                      |
|                               | 23b    | Discuss any limitations of the evidence included in the review.                                                                                                                                                                                                                      | Page 16/17                      |
|                               | 23c    | Discuss any limitations of the review processes used.                                                                                                                                                                                                                                | Page 16/17                      |
|                               | 23d    | Discuss implications of the results for practice, policy, and future research.                                                                                                                                                                                                       | Page 17                         |
| <b>OTHER INFORMATION</b>      |        |                                                                                                                                                                                                                                                                                      |                                 |
| Registration and protocol     | 24a    | Provide registration information for the review, including register name and registration number, or state that the review was not registered.                                                                                                                                       | Page 1                          |
|                               | 24b    | Indicate where the review protocol can be accessed, or state that a protocol was not prepared.                                                                                                                                                                                       | Page 1                          |

| Section and Topic                              | Item # | Checklist item                                                                                                                                                                                                                             | Location where item is reported |
|------------------------------------------------|--------|--------------------------------------------------------------------------------------------------------------------------------------------------------------------------------------------------------------------------------------------|---------------------------------|
|                                                | 24c    | Describe and explain any amendments to information provided at registration or in the protocol.                                                                                                                                            | -                               |
| Support                                        | 25     | Describe sources of financial or non-financial support for the review, and the role of the funders or sponsors in the review.                                                                                                              | -                               |
| Competing interests                            | 26     | Declare any competing interests of review authors.                                                                                                                                                                                         | Page 1                          |
| Availability of data, code and other materials | 27     | Report which of the following are publicly available and where they can be found: template data collection forms; data extracted from included studies; data used for all analyses; analytic code; any other materials used in the review. | Page 1/10                       |

From: Page MJ, McKenzie JE, Bossuyt PM, Boutron I, Hoffmann TC, Mulrow CD, et al. The PRISMA 2020 statement: an updated guideline for reporting systematic reviews. *BMJ* 2021;372:n71. doi: 10.1136/bmj.n71  
 For more information, visit: <http://www.prisma-statement.org/>

### Additional References

- Egger, M., Smith, G. D., Schneider, M., & Minder, C. (1997). Bias in meta-analysis detected by a simple, graphical test. *British Medical Journal*, *315*, 629–634.  
<https://doi.org/10.1136/bmj.315.7109.629>
- Hakstian, A. R., & Whalen, T. E. (1976). A k-sample significance test for independent alpha coefficients. *Psychometrika*, *41*, 219-231. <https://doi.org/10.1007/BF02291840>
- Pustejovsky, J. (2021). *clubSandwich: Cluster-Robust (Sandwich) Variance Estimators with Small-Sample Corrections* (version 0.5.3). [R package]. <https://CRAN.R-project.org/package=clubSandwich>
- Pustejovsky, J., & Tipton (2021). Meta-analysis with robust variance estimation: Expanding the range of working models. *MetaArxiv Preprints*.  
<https://doi.org/10.31222/osf.io/vyfcj>
- Rodriguez, M. C., & Maeda, Y. (2006). Meta-analysis of coefficient alpha. *Psychological Methods*, *11*(3), 306-322. <https://doi.org/10.1037/1082-989x.11.3.306>
- Stanley, T. D. (2008). Meta-regression methods for detecting and estimating empirical effect in the presence of publication selection. *Oxford Bulletin of Economics and Statistics*, *70*, 103-127. <https://doi.org/10.1111/j.1468-0084.2007.00487.x>
